# Supplementary material for: Inhibition of oxygen dimerization by local symmetry tuning in Li-rich layered oxides for improved stability
Source: PubMed Central journal article supplement (PMC7532436; doi:10.1038/s41467-020-18423-7), 2020-10-02
Supplement: 41467_2020_18423_MOESM1_ESM.pdf [file 41467_2020_18423_MOESM1_ESM.pdf]

# **Supplementary Information**

## **Inhibition of oxygen dimerization by local symmetry tuning in Li-rich layered oxides for improved stability**

Ning et al.

## Supplementary Figures

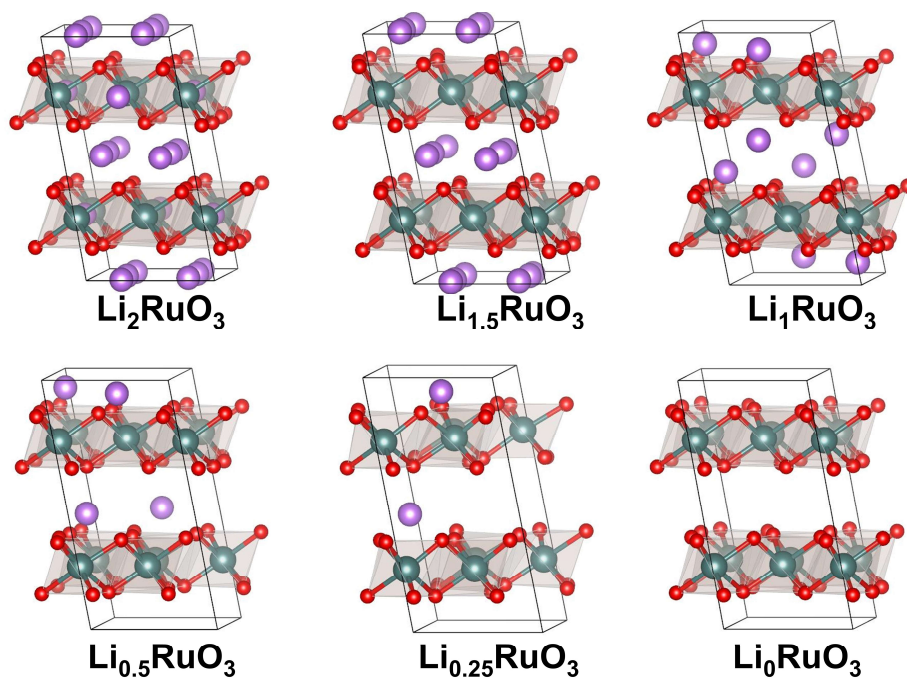

**Supplementary Figure 1. The optimized structures upon delithiation.** The lowest energy structures of  $\text{R-Li}_{2-x}\text{RuO}_3$  for  $x = 0, 0.5, 1.0, 1.5, 1.75, 2.0$ . The purple, dark cyan, and red spheres are Li, Ru, and O, respectively.

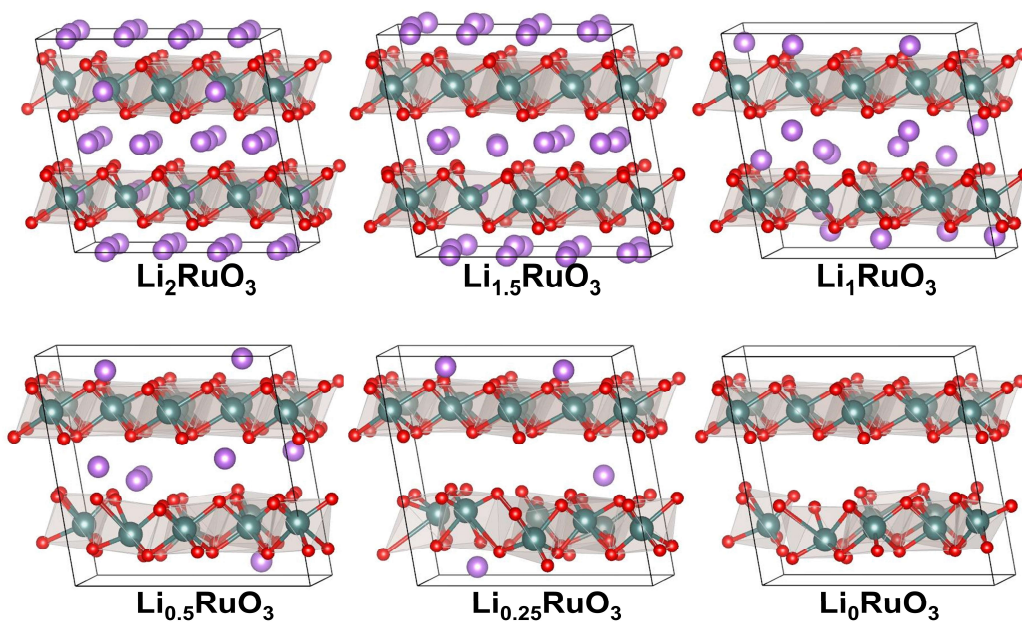

**Supplementary Figure 2. The optimized structures upon delithiation.** The lowest energy structures of ID-Li<sub>2-x</sub>RuO<sub>3</sub> for  $x = 0, 0.5, 1.0, 1.5, 1.75, 2.0$ . The purple, dark cyan, and red spheres are Li, Ru, and O, respectively.

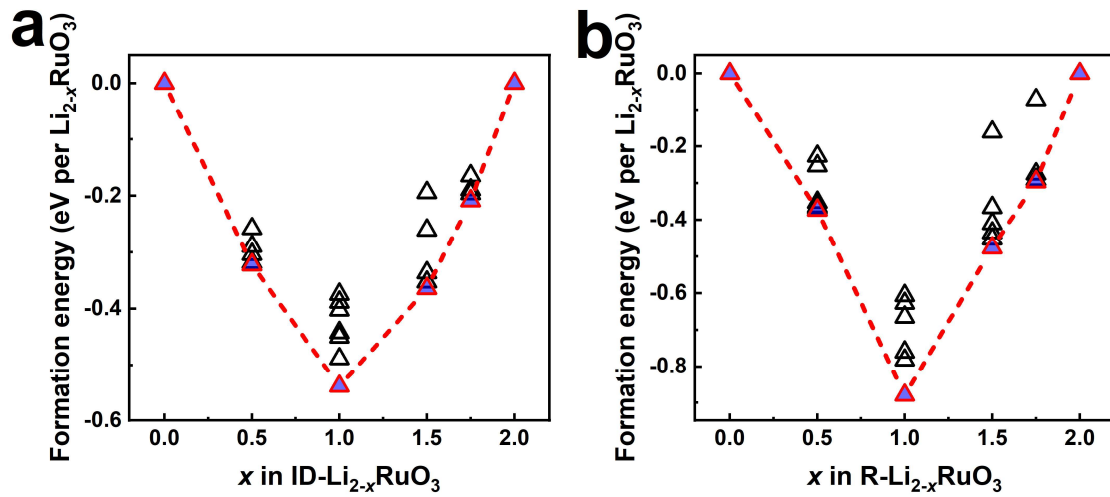

**Supplementary Figure 3. The delithiation formation energy. a,b** The delithiation formation energy of  $\text{ID-Li}_{2-x}\text{RuO}_3$  (**a**) and  $\text{R-Li}_{2-x}\text{RuO}_3$  (**b**). The formation energy is defined as  $E_f(\text{Li}_{2-x}\text{RuO}_3) = E(\text{Li}_{2-x}\text{RuO}_3) - 0.5(2-x) E(\text{Li}_2\text{RuO}_3) - 0.5 x E(\text{RuO}_3)$ .

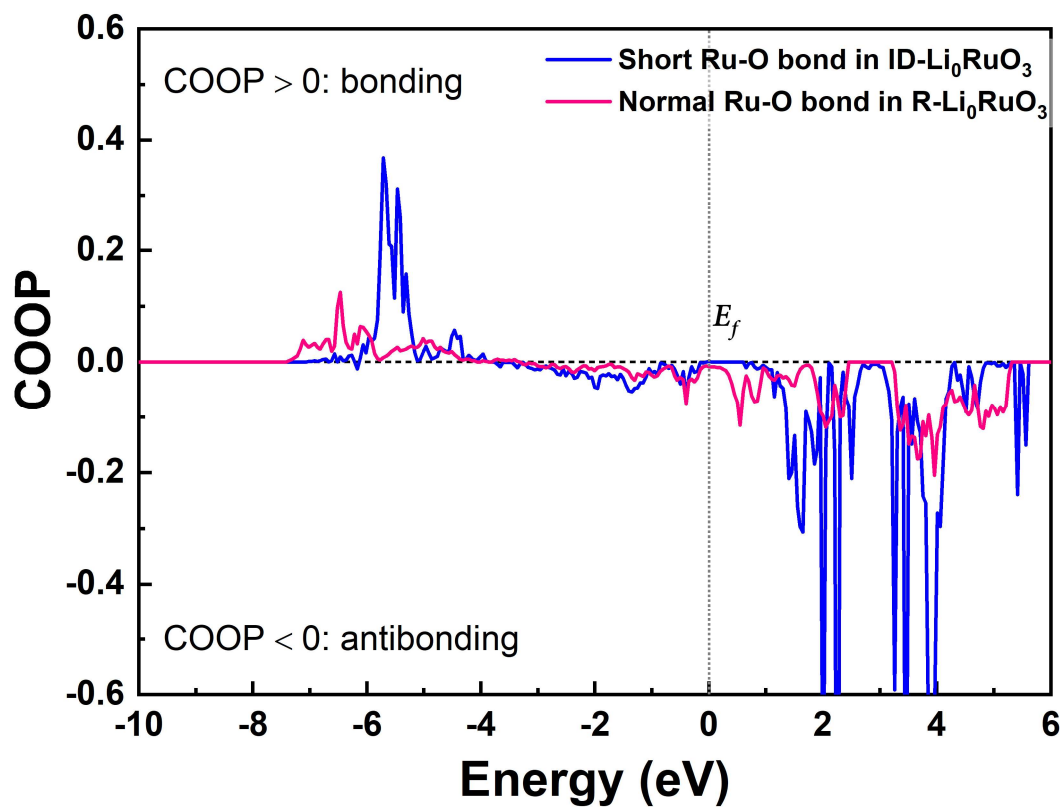

**Supplementary Figure 4. The crystal orbital overlap population.** The crystal orbital overlap population (COOP) results of the short Ru–O bond in ID-Li<sub>0</sub>RuO<sub>3</sub> and normal Ru–O bond in R-Li<sub>0</sub>RuO<sub>3</sub>.

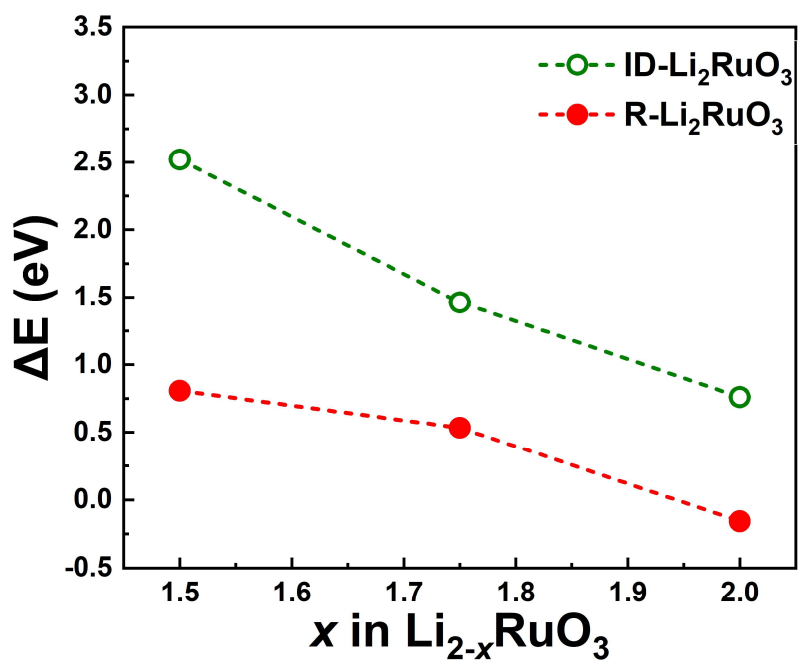

**Supplementary Figure 5. The formation energy of Ru anti-site defects.** The formation energy ( $\Delta E$ ) of Ru anti-site defects (Ru migrate to octahedral sites of Li layer) in deep delithiated ID- $\text{Li}_{2-x}\text{RuO}_3$  and R- $\text{Li}_{2-x}\text{RuO}_3$  ( $x = 1.5, 1.75, 2$ ). The same Ru anti-site defects concentration of 1/16 (6% of the total Ru content) is considered for both ID- $\text{Li}_{2-x}\text{RuO}_3$  and R- $\text{Li}_{2-x}\text{RuO}_3$ .

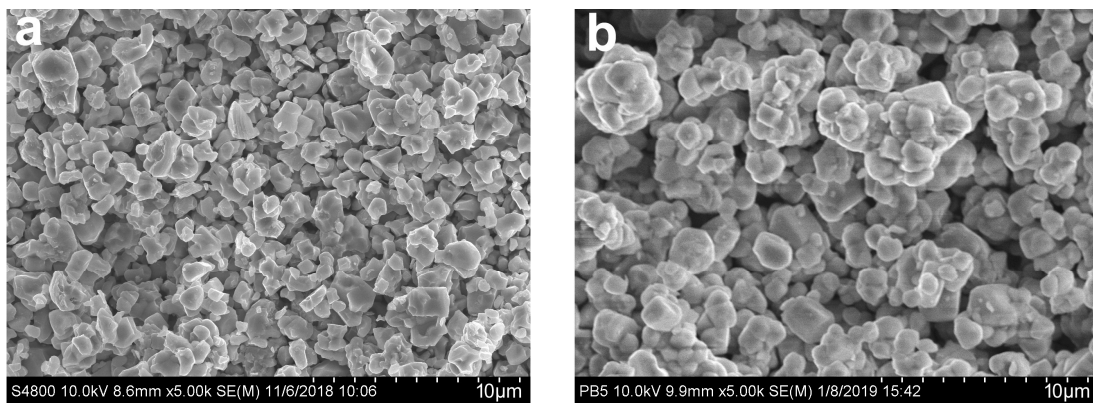

**Supplementary Figure 6. SEM images. a,b** SEM images of ID-Li<sub>2</sub>RuO<sub>3</sub> (a) and R-Li<sub>2</sub>RuO<sub>3</sub> (b).

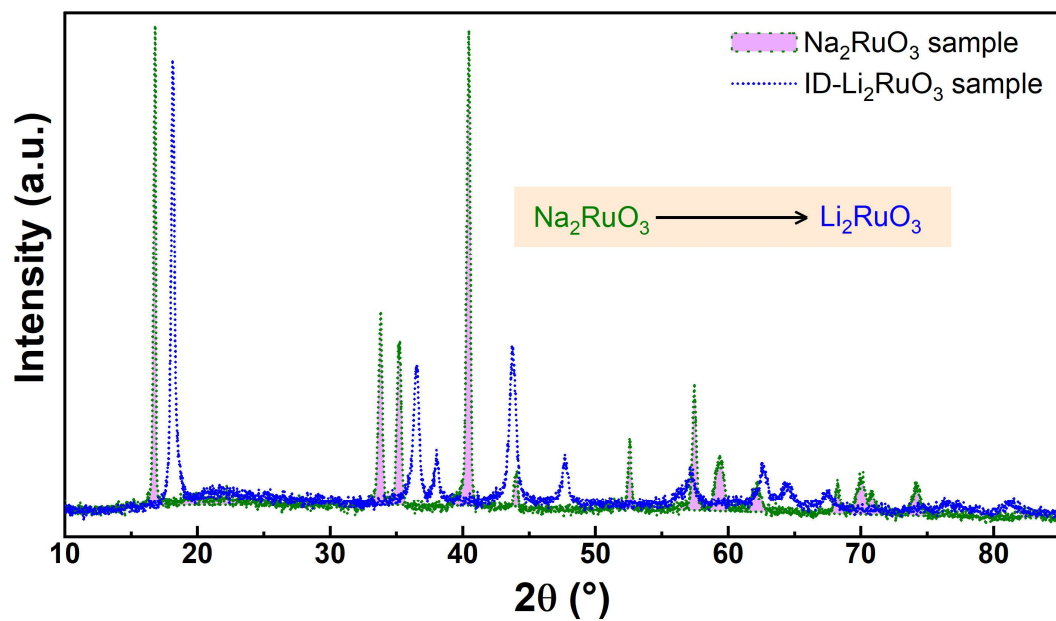

Supplementary Figure 7. XRD patterns of  $\text{Na}_2\text{RuO}_3$  and ID- $\text{Li}_2\text{RuO}_3$ . The ID- $\text{Li}_2\text{RuO}_3$  sample was obtained by Li/Na-ion exchange of the  $\text{Na}_2\text{RuO}_3$  sample.



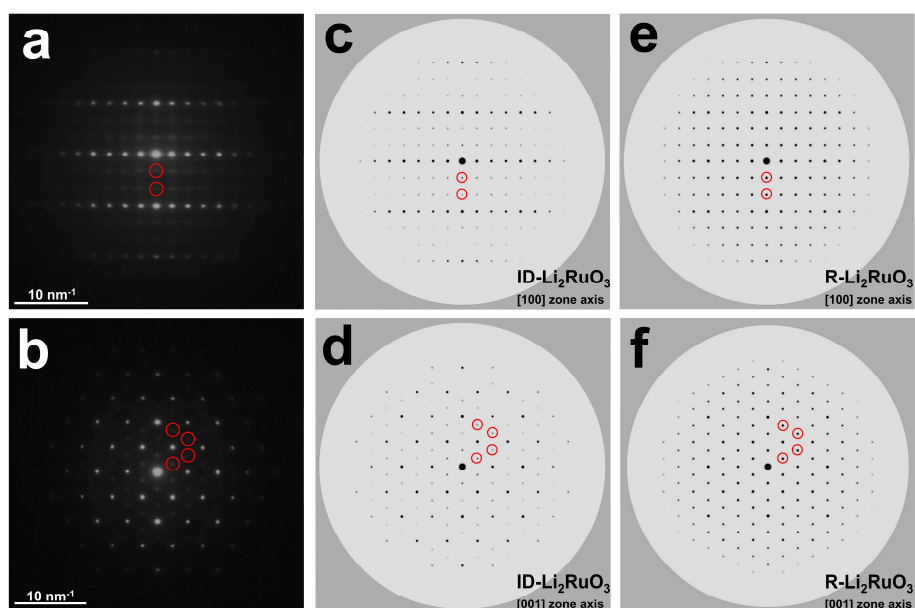

**Supplementary Figure 8. The observed and simulated SAED patterns.** **a,b** The observed SAED patterns (**a-b**). The weaker diffraction spots are marked with red cycles. **c-f** The simulated SAED patterns of ID-Li<sub>2</sub>RuO<sub>3</sub> and R-Li<sub>2</sub>RuO<sub>3</sub> structure models along [100] (**c-d**) and [001] (**e-f**) zone axes, respectively. The ID-Li<sub>2</sub>RuO<sub>3</sub> and R-Li<sub>2</sub>RuO<sub>3</sub> structure models with C2/m space group used for SAED simulation are taken from the XRD refinements.

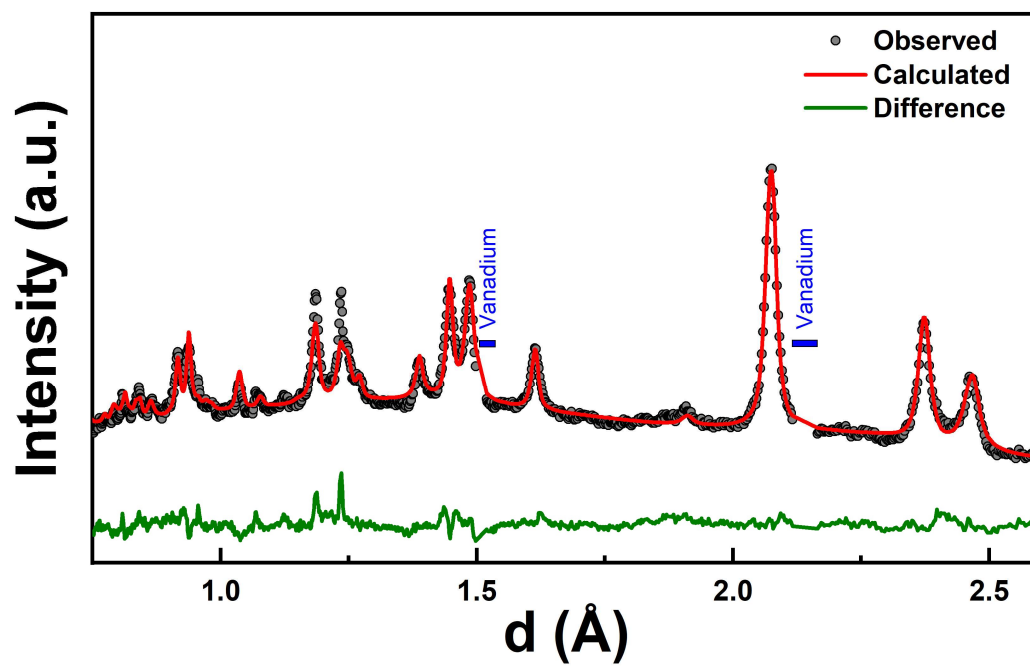

**Supplementary Figure 9. NPD patterns of ID-Li<sub>2</sub>RuO<sub>3</sub>.** The impurity peaks of the vanadium pot are omitted within the marked ranges.

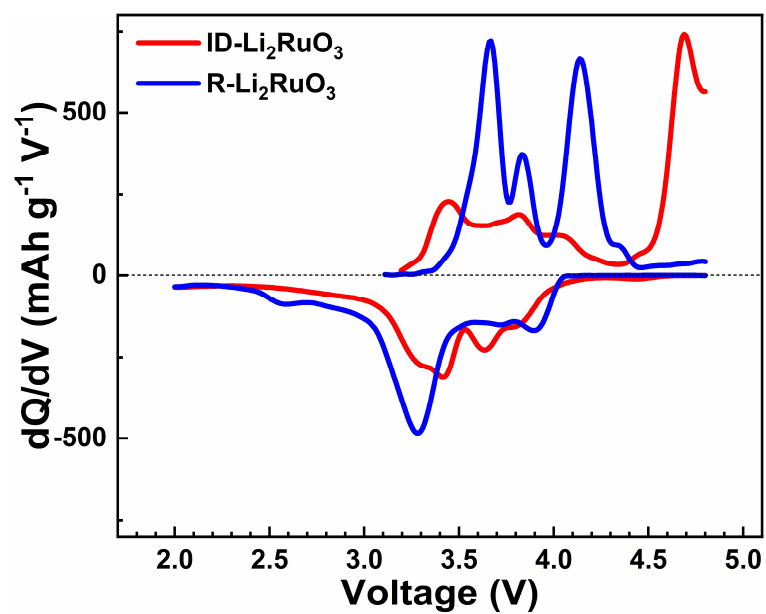

**Supplementary Figure 10. The  $dQ/dV$  plots.** The  $dQ/dV$  plots of ID- $\text{Li}_2\text{RuO}_3$  and R- $\text{Li}_2\text{RuO}_3$  cathodes tested in the voltage range of 2.0–4.8 V at a current density of 30  $\text{mA g}^{-1}$ .

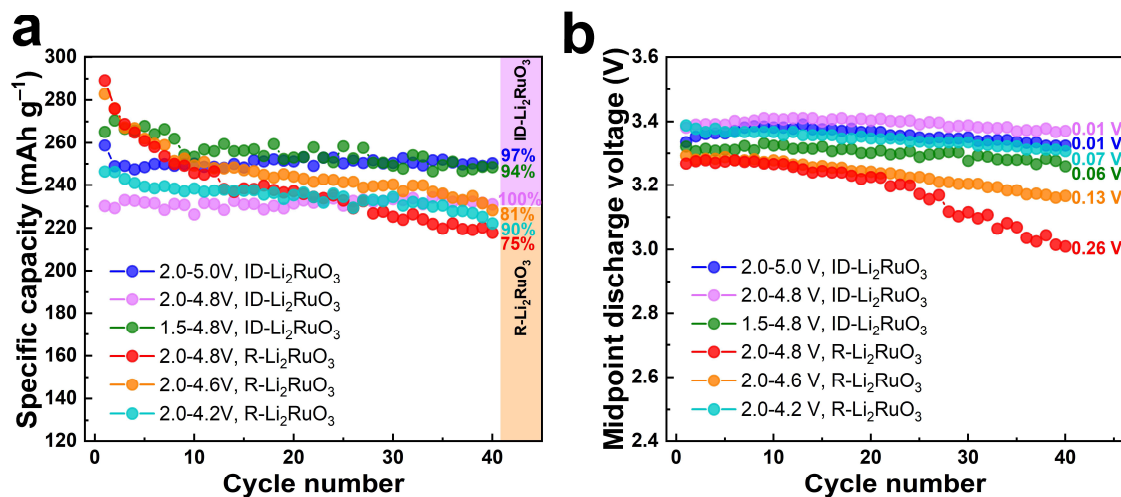

**Supplementary Figure 11. Cycling stability. a,b** Cycling performance (a) and midpoint discharge voltage (b) of ID- $\text{Li}_2\text{RuO}_3$  in the voltage ranges of 2.0–5.0 V, 2.0–4.8 V, and 1.5–4.8 V compared with those of R- $\text{Li}_2\text{RuO}_3$  in the voltage ranges of 2.0–4.6 V, 2.0–4.8 V, and 2.0–4.2 V at a current density of  $30 \text{ mA g}^{-1}$ .

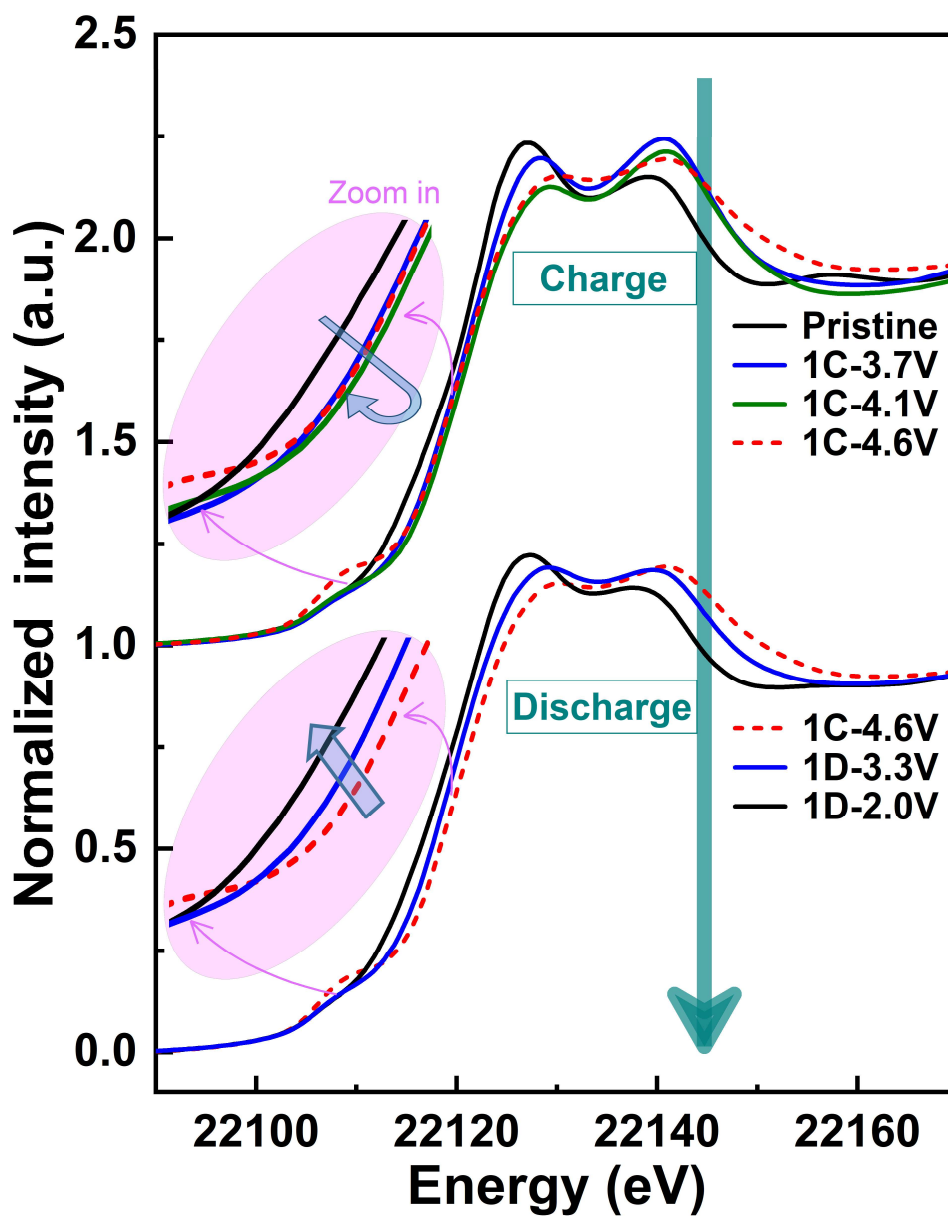

**Supplementary Figure 12. Ru K-edge XANES spectra.** Ru K-edge XANES spectra of R-Li<sub>2</sub>RuO<sub>3</sub> during charge and discharge processes. 1C, 1D represent the first charge and discharge, respectively.

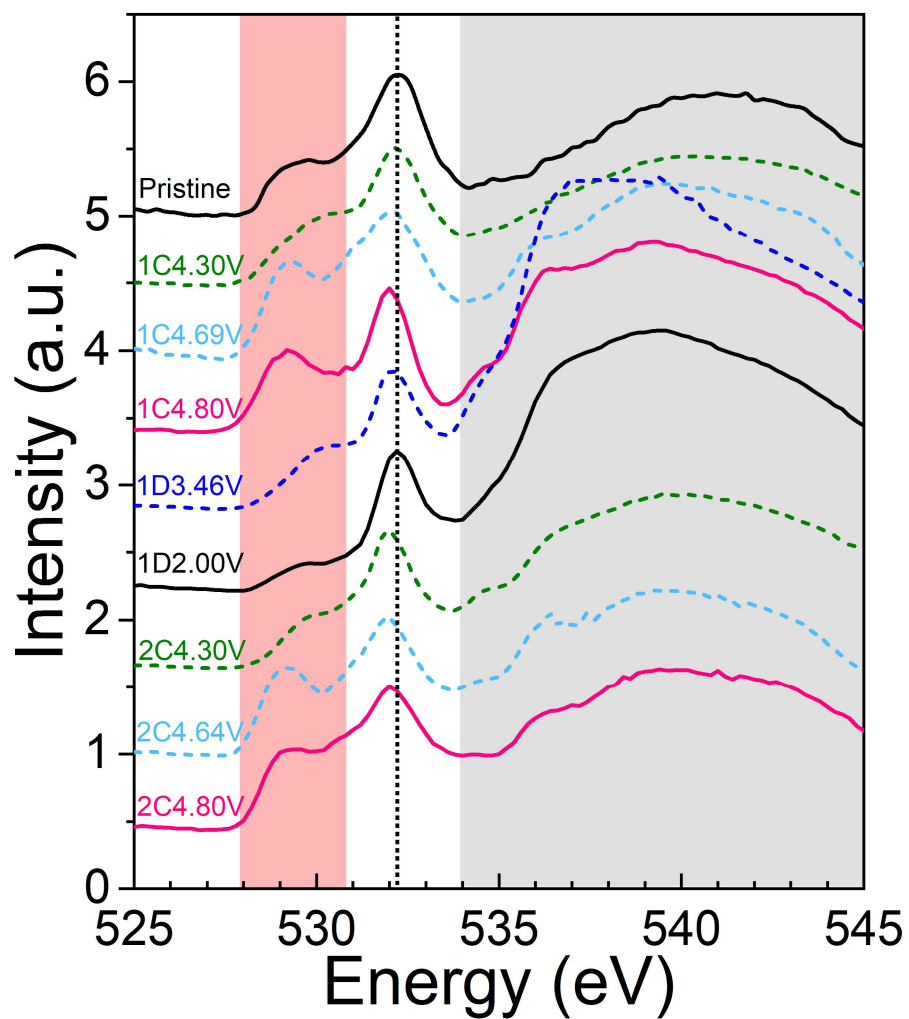

**Supplementary Figure 13. O K-edge XANES spectra.** *Ex situ* O K-edge XANES spectra of ID-Li<sub>2</sub>RuO<sub>3</sub> at various states of charge. 1C, 1D and 2C represent the first charge, first discharge and second charge, respectively.

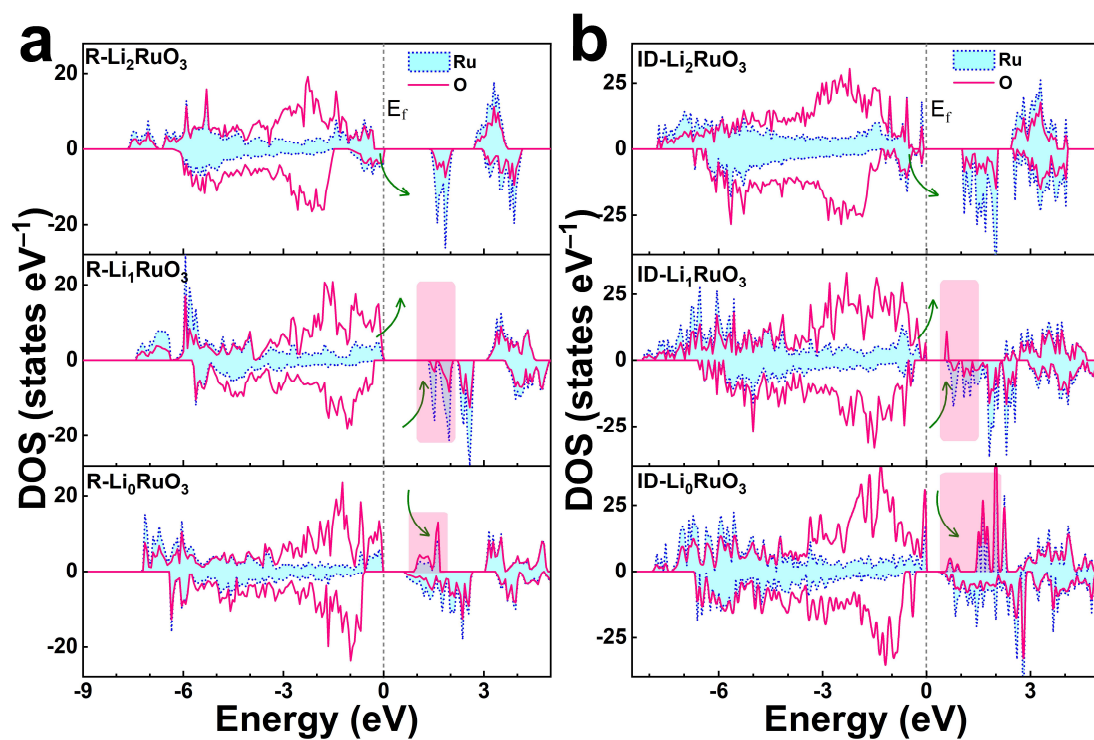

Supplementary Figure 14. Density of states (DOS). a,b DOS of R-Li $_{2-x}$ RuO $_3$  (a) and ID-Li $_{2-x}$ RuO $_3$  (b) systems with respect to the Li content.

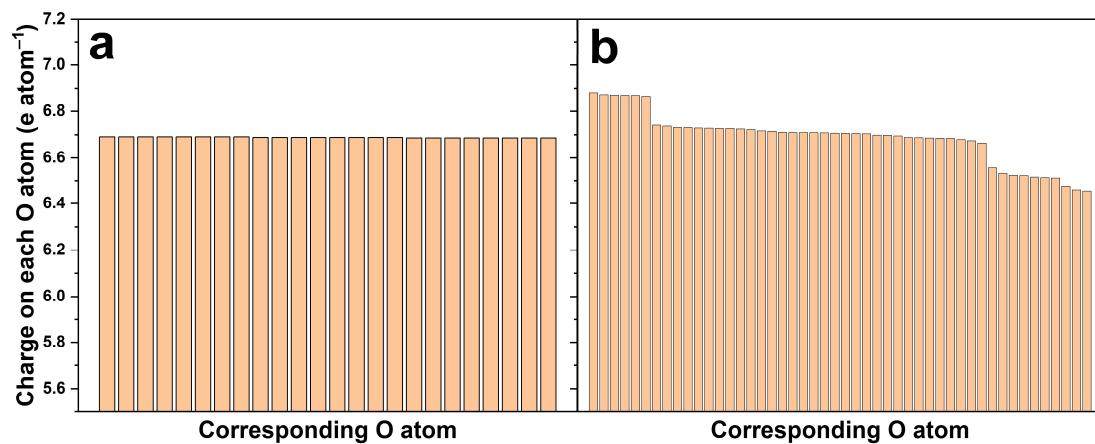

**Supplementary Figure 15. Bader charge analysis. a,b** Charge on each O ion in fully delithiated R-Li<sub>2</sub>RuO<sub>3</sub> (a) and ID-Li<sub>2</sub>RuO<sub>3</sub> (b) systems, as obtained from Bader charge analysis.



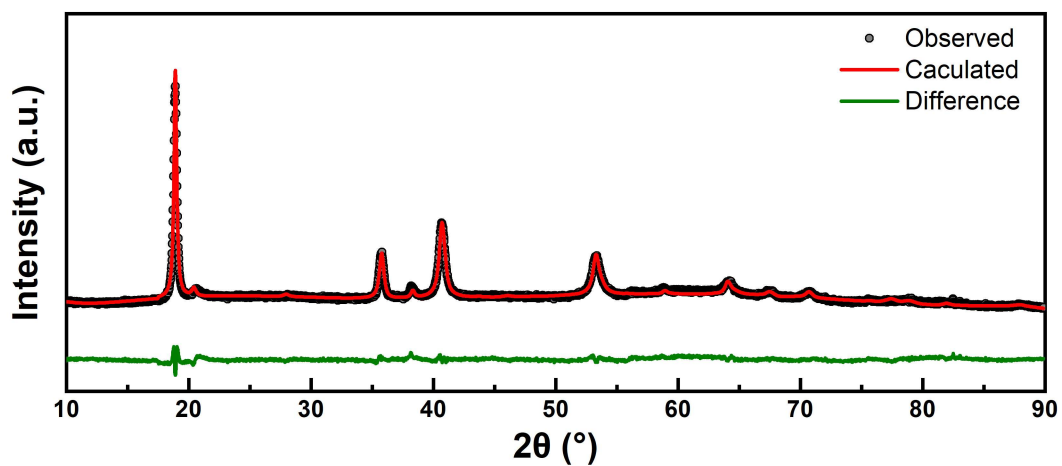

**Supplementary Figure 16. The refinement of XRD patterns.** The refinement of XRD patterns of ID-Li<sub>2</sub>RuO<sub>3</sub> that charged to 4.8 V.

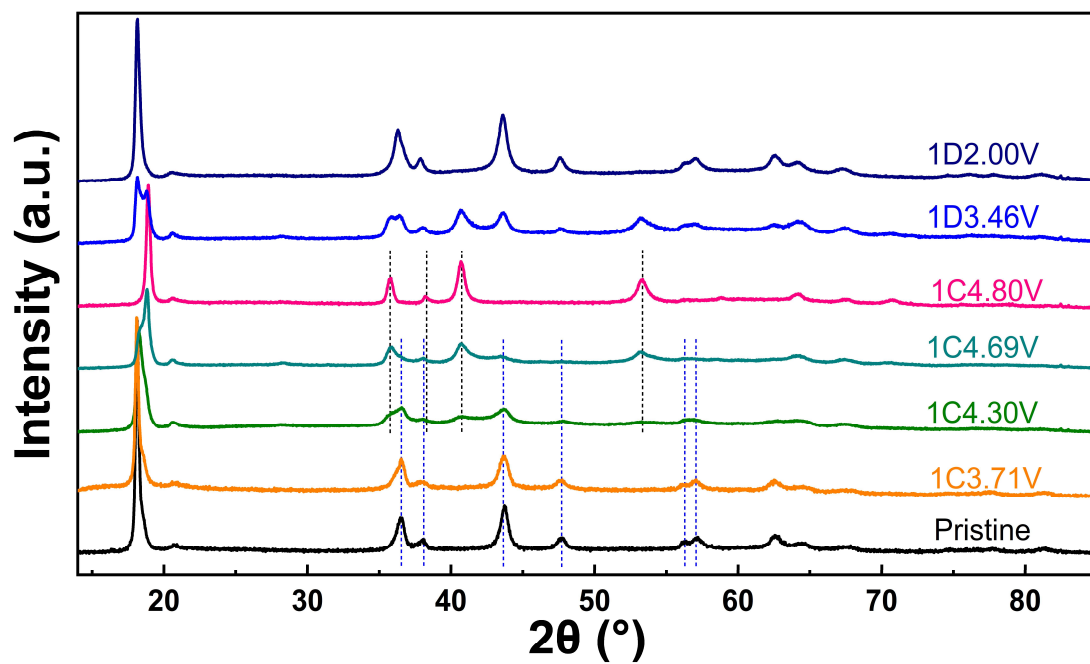

Supplementary Figure 17. XRD patterns of ID-Li<sub>2</sub>RuO<sub>3</sub>. The *ex situ* XRD patterns of ID-Li<sub>2</sub>RuO<sub>3</sub>. 1C, 1D represent the first charge and discharge, respectively.

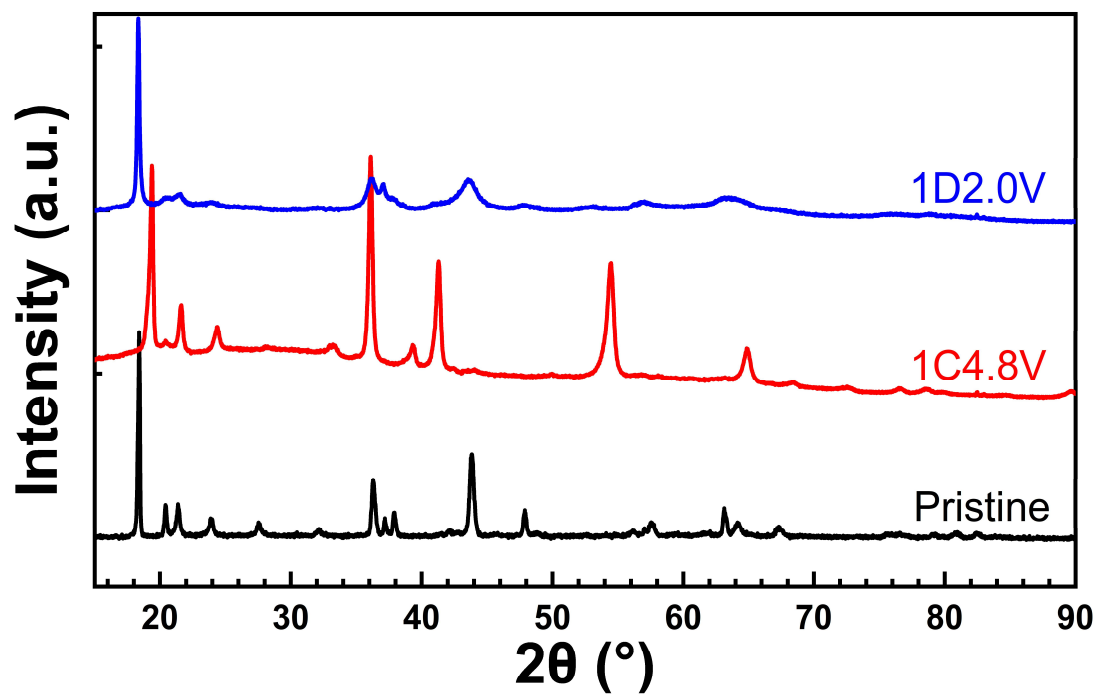

**Supplementary Figure 18. XRD patterns of R-Li<sub>2</sub>RuO<sub>3</sub>.** The *ex situ* XRD patterns of R-Li<sub>2</sub>RuO<sub>3</sub> during charging and discharging. 1C, 1D represent the first charge and discharge, respectively.

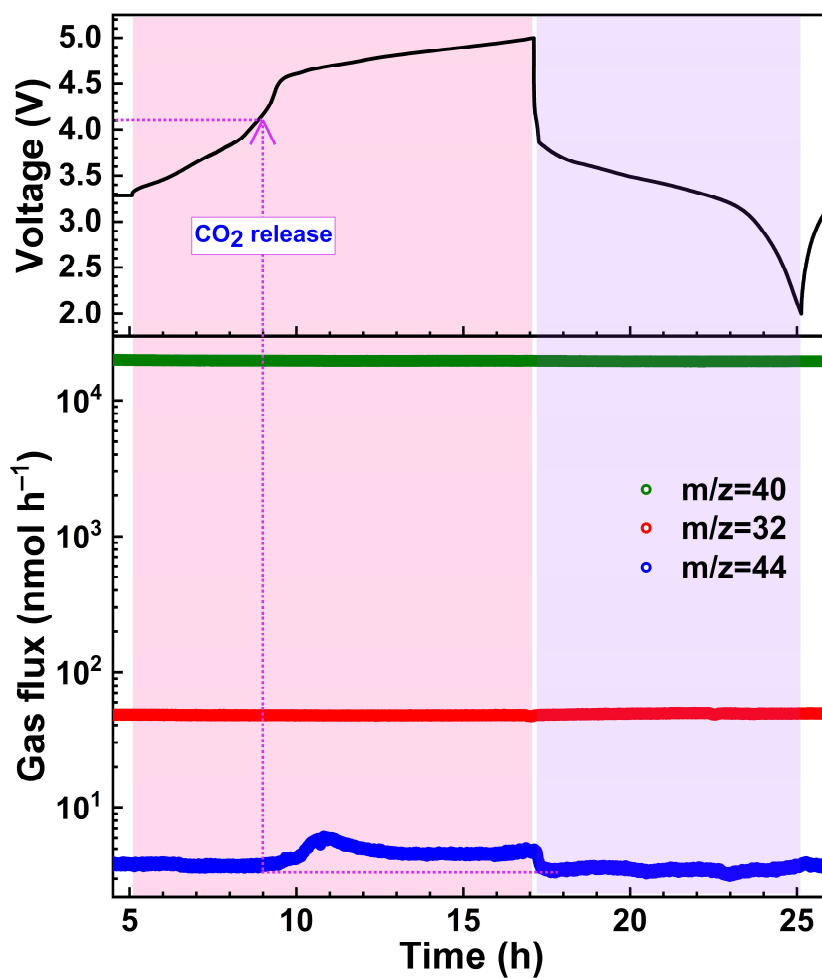

**Supplementary Figure 19. Differential electrochemistry mass spectrometry (DEMS).** Gas evolution detected by *in situ* DEMS in the ID-Li<sub>2</sub>RuO<sub>3</sub> vs. Li cell in the voltage range of 2.0–5.0 V at a current density of 30 mA g<sup>-1</sup>.

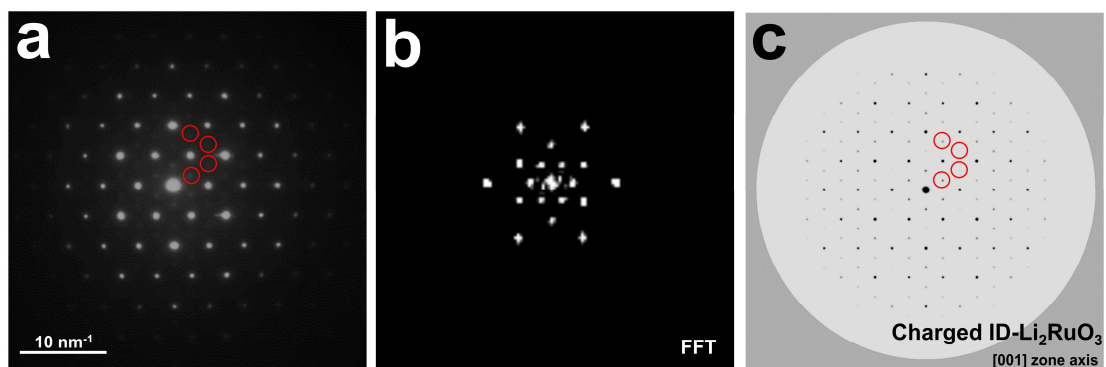

**Supplementary Figure 20. Observed and simulated SEAD Patterns.** **a** The observed SEAD patterns of 4.8V charged ID-Li<sub>2</sub>RuO<sub>3</sub>, **b** the FFT patterns from ABF-STEM image of 4.8V charged ID-Li<sub>2</sub>RuO<sub>3</sub>, and **c** simulated SEAD of the O1-type structure with Li/Ru disordering arrangement obtained from XRD refinement of 4.8V charged sample.

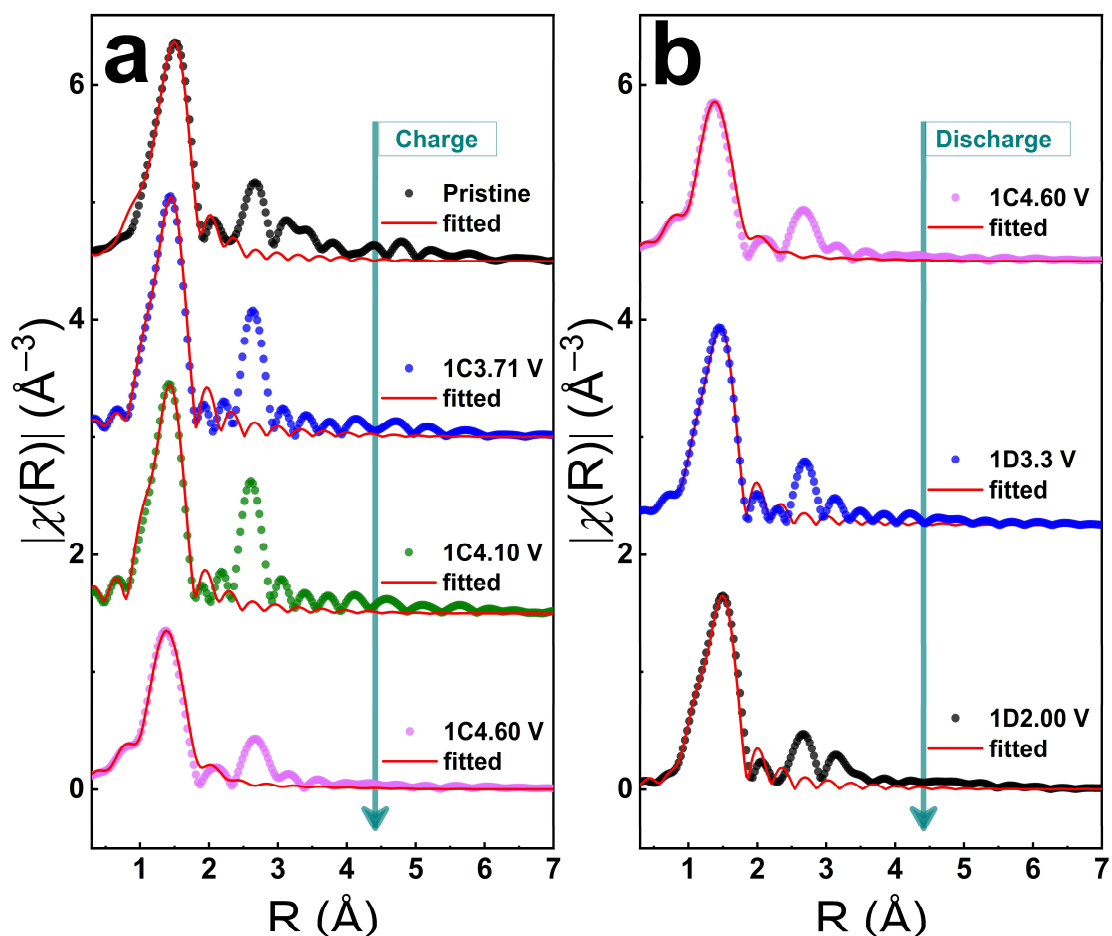

**Supplementary Figure 21. The Fourier transform of EXAFS of Ru K-edge. a,b** Fitting results for the magnitude of the Fourier transforms performed on  $k^2$ -weighted EXAFS oscillations of  $R\text{-Li}_2\text{RuO}_3$  during the first charge (a) and discharge (b) processes in the  $R$ -range of 1–2 Å (first peak only).  $E_0$  was set to  $-0.7$  eV, and the amplitude reduction factor ( $S_0^2$ ) was fixed at 0.95. 1C, 1D represent the first charge and discharge, respectively. Two group of Ru–O bonds were considered during fitting based on the presence of two crests in the Ru K-edge XANES spectra shown in Supplementary Figure 12.

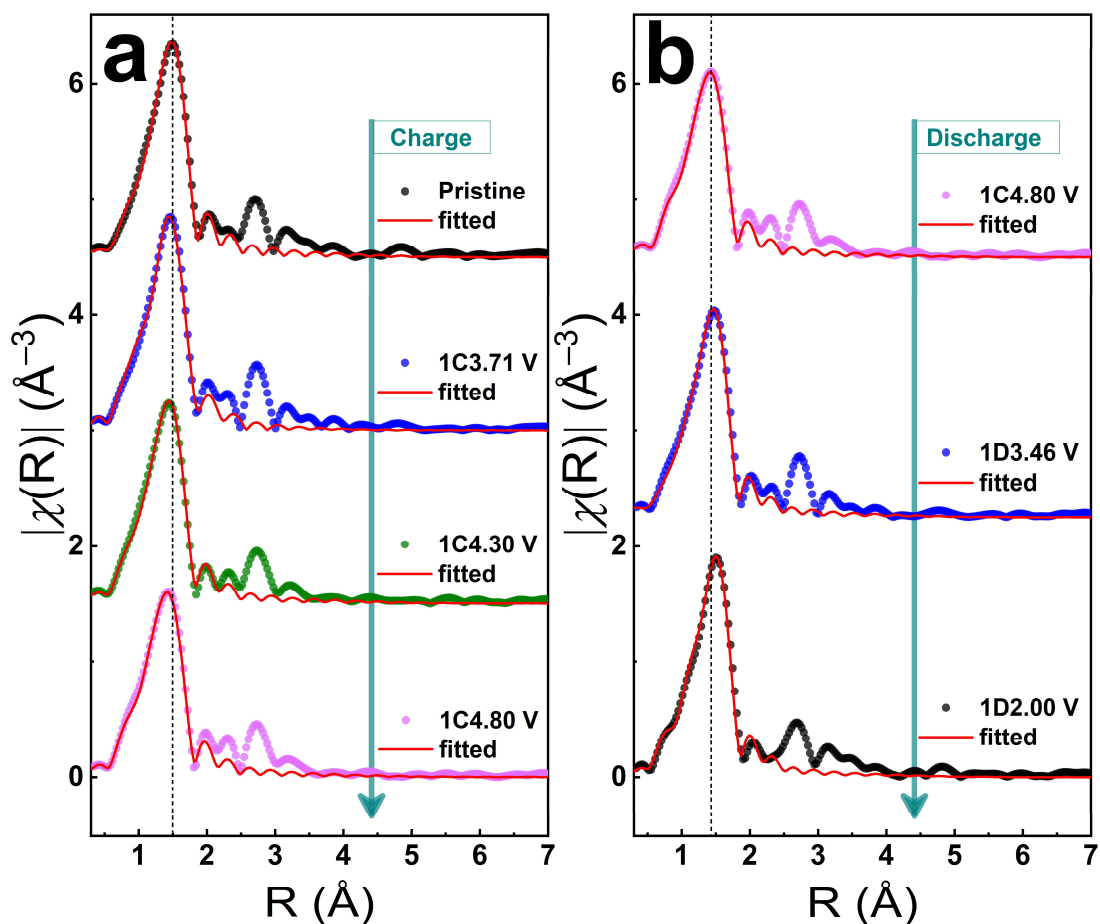

**Supplementary Figure 22. The Fourier transform of EXAFS of Ru K-edge. a,b** Fitting results for the magnitude of the Fourier transforms performed on  $k^2$ -weighted EXAFS oscillations of ID- $\text{Li}_2\text{RuO}_3$  during the first charge (a) and discharge (b) processes in the  $R$ -range of 1–2 Å (first peak only).  $E_0$  was set to  $-0.7$  eV, and the amplitude reduction factor ( $S_0^2$ ) was fixed at 0.95. 1C, 1D represent the first charge and discharge, respectively. Two group of Ru–O bonds were considered during fitting based on the presence of two crests in the Ru K-edge XANES spectra shown in Figure 5a.

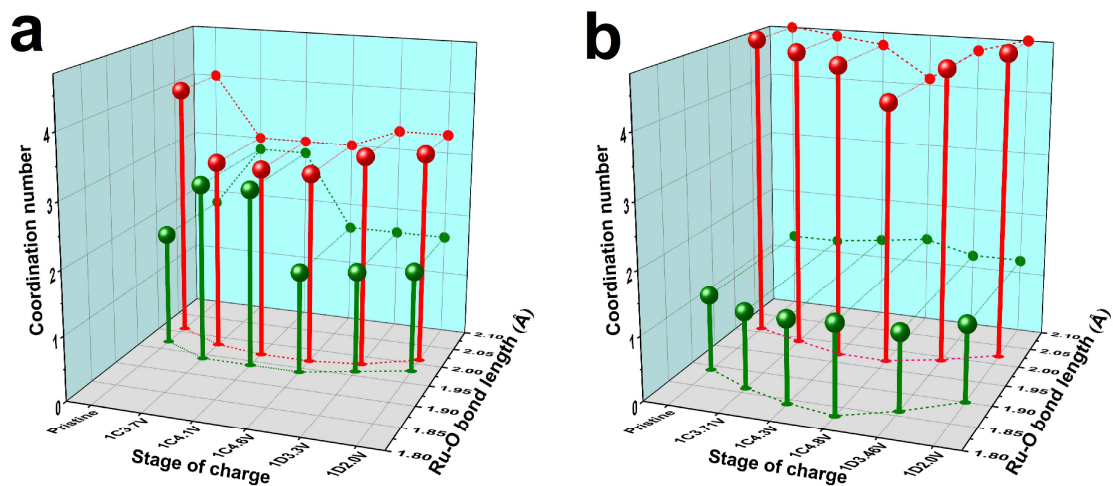

**Supplementary Figure 23.** The results of Ru–O shell from EXAFS fitting. **a,b** Fitted Ru–O shell of the Fourier-transformed  $k^2$ -weighted EXAFS oscillations of ID- $\text{Li}_2\text{RuO}_3$  (**a**), and R- $\text{Li}_2\text{RuO}_3$  (**b**). 1C, 1D represent the first charge and discharge, respectively.



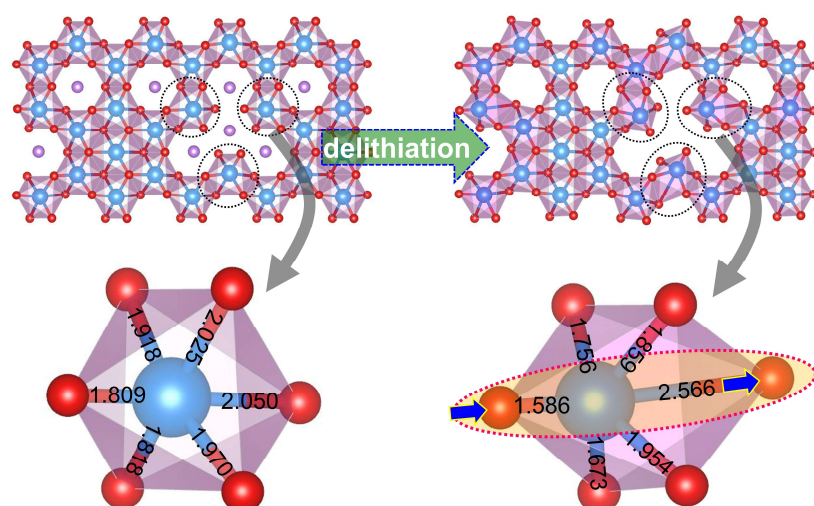

**Supplementary Figure 24. Structural response modes of ID- $\text{Li}_2\text{MnO}_3$  upon delithiation.** Optimized crystal structures and local  $\text{MnO}_6$  octahedrons of  $\text{Li}_2\text{MnO}_3$  and the corresponding delithiated state ( $\text{Li}_0\text{MnO}_3$ ) for ID- $\text{Li}_2\text{MnO}_3$ . The values (in angstrom) on the local structures are the Mn–O bond lengths.

## Supplementary Tables

**Supplementary Table 1.** The total energies (in eV) of the systems with and without oxygen loss at the three kinds of oxygen sites for ID-Li<sub>2-x</sub>RuO<sub>3</sub>.

| Vacancy sites                             | O <sub>center</sub> [Ru <sub>1</sub> Li <sub>5</sub> ] | O <sub>center</sub> [Ru <sub>2</sub> Li <sub>4</sub> ] | O <sub>center</sub> [Ru <sub>3</sub> Li <sub>3</sub> ] |
|-------------------------------------------|--------------------------------------------------------|--------------------------------------------------------|--------------------------------------------------------|
| E(Li <sub>2</sub> RuO <sub>3</sub> -O)    | -532.050                                               | -531.661                                               | -531.660                                               |
| E(Li <sub>2</sub> RuO <sub>3</sub> )      |                                                        | -539.671                                               |                                                        |
| E(Li <sub>1.5</sub> RuO <sub>3</sub> -O)  | -492.821                                               | -491.853                                               | -491.639                                               |
| E(Li <sub>1.5</sub> RuO <sub>3</sub> )    |                                                        | -499.557                                               |                                                        |
| E(Li <sub>1</sub> RuO <sub>3</sub> -O)    | -453.183                                               | -451.212                                               | -450.621                                               |
| E(Li <sub>1</sub> RuO <sub>3</sub> )      |                                                        | -458.800                                               |                                                        |
| E(Li <sub>0.5</sub> RuO <sub>3</sub> -O)  | -405.751                                               | -403.612                                               | -403.285                                               |
| E(Li <sub>0.5</sub> RuO <sub>3</sub> )    |                                                        | -411.281                                               |                                                        |
| E(Li <sub>0.25</sub> RuO <sub>3</sub> -O) | -380.719                                               | -379.946                                               | -378.729                                               |
| E(Li <sub>0.25</sub> RuO <sub>3</sub> )   |                                                        | -386.417                                               |                                                        |
| E(Li <sub>0</sub> RuO <sub>3</sub> -O)    | -355.806                                               | -355.471                                               | -355.043                                               |
| E(Li <sub>0</sub> RuO <sub>3</sub> )      |                                                        | -360.711                                               |                                                        |

**Supplementary Table 2.** The total energies (in eV) of the systems with and without oxygen loss for R-Li<sub>2-x</sub>RuO<sub>3</sub>.

| Vacancy sites                             | O <sub>center</sub> [Ru <sub>2</sub> Li <sub>4</sub> ] |
|-------------------------------------------|--------------------------------------------------------|
| E(Li <sub>2</sub> RuO <sub>3</sub> -O)    | -533.365                                               |
| E(Li <sub>2</sub> RuO <sub>3</sub> )      | -541.172                                               |
| E(Li <sub>1.5</sub> RuO <sub>3</sub> -O)  | -493.482                                               |
| E(Li <sub>1.5</sub> RuO <sub>3</sub> )    | -501.158                                               |
| E(Li <sub>1</sub> RuO <sub>3</sub> -O)    | -455.764                                               |
| E(Li <sub>1</sub> RuO <sub>3</sub> )      | -463.509                                               |
| E(Li <sub>0.5</sub> RuO <sub>3</sub> -O)  | -406.474                                               |
| E(Li <sub>0.5</sub> RuO <sub>3</sub> )    | -411.305                                               |
| E(Li <sub>0.25</sub> RuO <sub>3</sub> -O) | -380.565                                               |
| E(Li <sub>0.25</sub> RuO <sub>3</sub> )   | -385.533                                               |
| E(Li <sub>0</sub> RuO <sub>3</sub> -O)    | -355.622                                               |
| E(Li <sub>0</sub> RuO <sub>3</sub> )      | -358.250                                               |

**Supplementary Table 3.** Values used in the calculation of the total energy of the O<sub>2</sub> molecule. The energies of the H<sub>2</sub>O and H<sub>2</sub> molecules were obtained from our first-principles study, while TS and ZPE were taken from the literature.<sup>1</sup>

| Molecule type | H <sub>2</sub> O | H <sub>2</sub> | O <sub>2</sub>      |
|---------------|------------------|----------------|---------------------|
| E (eV)        | -14.273          | -6.800         | -9.426 <sup>a</sup> |
| TS (eV)       | 0.67             | 0.41           | 0.64                |
| ZPE (eV)      | 0.56             | 0.27           | 0.10                |

<sup>a</sup> The E(O<sub>2</sub>) is obtained from Equation S4.

**Supplementary Table 4.** Crystallographic parameters and structure determination details for ID-Li<sub>2</sub>RuO<sub>3</sub> and R-Li<sub>2</sub>RuO<sub>3</sub> from XRD and NPD refinement.

| Space group              | ID-Li <sub>2</sub> RuO <sub>3</sub> |                | R-Li <sub>2</sub> RuO <sub>3</sub> |
|--------------------------|-------------------------------------|----------------|------------------------------------|
|                          | XRD refinement                      | NPD refinement | XRD refinement                     |
|                          | C2/m (No. 12)                       | C2/m (No. 12)  | C2/m (No. 12)                      |
| a (Å)                    | 4.9938                              | 5.0065         | 5.0399                             |
| b (Å)                    | 8.6844                              | 8.7082         | 8.7497                             |
| c (Å)                    | 5.1798                              | 5.1848         | 5.1420                             |
| $\alpha = \gamma$ (°)    | 90.000                              | 90.000         | 90.000                             |
| $\beta$ (°)              | 108.587                             | 108.640        | 109.049                            |
| Volume (Å <sup>3</sup> ) | 212.922                             | 214.190        | 214.330                            |
| R <sub>wp</sub> (%)      | 5.11                                | 3.58           | 11.04                              |
| R <sub>p</sub> (%)       | 3.88                                | 2.74           | 8.61                               |
| $\chi^2$                 | 4.137                               | 3.897          | 1.836                              |

**Supplementary Table 5.** Atomic coordinates of ID-Li<sub>2</sub>RuO<sub>3</sub> from XRD refinement.

| Atom  | Site | Coordinates |           |          | Occupation | Uiso (Å <sup>2</sup> ) |
|-------|------|-------------|-----------|----------|------------|------------------------|
|       |      | x           | y         | z        |            |                        |
| Ru(1) | 4h   | 0.000000    | 0.166728  | 0.500000 | 0.701515   | 0.056554               |
| Li(1) | 4h   | 0.000000    | 0.166728  | 0.500000 | 0.298485   | 0.029000               |
| Li(2) | 2d   | -0.500000   | 0.000000  | 0.500000 | 0.403732   | 0.029000               |
| Ru(2) | 2d   | -0.500000   | 0.000000  | 0.500000 | 0.596268   | 0.052420               |
| Li(3) | 4g   | -0.500000   | -0.166720 | 0.000000 | 0.999757   | 0.020071               |
| Ru(3) | 4g   | -0.500000   | -0.166720 | 0.000000 | 0.000243   | 0.055812               |
| Li(4) | 2a   | 0.000000    | 0.000000  | 0.000000 | 0.999784   | 0.028834               |
| Ru(4) | 2a   | 0.000000    | 0.000000  | 0.000000 | 0.000216   | 0.056950               |
| O(1)  | 8j   | 0.254592    | 0.168280  | 0.270732 | 1.000000   | 0.023340               |
| O(2)  | 4i   | -0.241671   | 0.000000  | 0.272298 | 1.000000   | 0.031790               |

**Supplementary Table 6.** Atomic coordinates of R-Li<sub>2</sub>RuO<sub>3</sub> sample from XRD refinement.

| Atom  | Site | Coordinates |           |          | Occupation | Uiso (Å <sup>2</sup> ) |
|-------|------|-------------|-----------|----------|------------|------------------------|
|       |      | x           | y         | z        |            |                        |
| Ru    | 4h   | 0.000000    | 0.167859  | 0.500000 | 1.000000   | 0.053716               |
| Li(1) | 2d   | -0.500000   | 0.000000  | 0.500000 | 1.000000   | 0.019000               |
| Li(2) | 4g   | -0.500000   | -0.158000 | 0.000000 | 1.000000   | 0.021024               |
| Li(3) | 2a   | 0.000000    | 0.000000  | 0.000000 | 1.000000   | 0.018437               |
| O(1)  | 8j   | 0.248934    | 0.172385  | 0.267545 | 1.000000   | 0.039705               |
| O(2)  | 4i   | -0.233513   | 0.000000  | 0.267525 | 1.000000   | 0.031569               |

**Supplementary Table 7.** Atomic coordinates of ID-Li<sub>2</sub>RuO<sub>3</sub> from NPD refinement.

| Atom  | Site | Coordinates |           |          | Occupation | Uiso (Å <sup>2</sup> ) |
|-------|------|-------------|-----------|----------|------------|------------------------|
|       |      | x           | y         | z        |            |                        |
| Ru(1) | 4h   | 0.000000    | 0.166732  | 0.500000 | 0.701204   | 0.031036               |
| Li(1) | 4h   | 0.000000    | 0.166732  | 0.500000 | 0.298796   | 0.023590               |
| Li(2) | 2d   | -0.500000   | 0.000000  | 0.500000 | 0.403153   | 0.030742               |
| Ru(2) | 2d   | -0.500000   | 0.000000  | 0.500000 | 0.596847   | 0.042297               |
| Li(3) | 4g   | -0.500000   | -0.166719 | 0.000000 | 0.999751   | 0.027274               |
| Ru(3) | 4g   | -0.500000   | -0.166719 | 0.000000 | 0.000249   | 0.047763               |
| Li(4) | 2a   | 0.000000    | 0.000000  | 0.000000 | 0.999753   | 0.027849               |
| Ru(4) | 2a   | 0.000000    | 0.000000  | 0.000000 | 0.000247   | 0.047832               |
| O(1)  | 8j   | 0.254588    | 0.168285  | 0.270731 | 1.000000   | 0.024047               |
| O(2)  | 4i   | -0.241668   | 0.000000  | 0.272302 | 1.000000   | 0.028501               |



**Supplementary Table 8.** Crystallographic parameters and structure determination details for 4.8V charged ID-Li<sub>2</sub>RuO<sub>3</sub> from XRD refinement.

| Sample                   | 4.8Vcharged ID-Li <sub>2</sub> RuO <sub>3</sub> |
|--------------------------|-------------------------------------------------|
| Space group              | C2/m (No. 12)                                   |
| a (Å)                    | 5.037718                                        |
| b (Å)                    | 8.718863                                        |
| c (Å)                    | 4.712646                                        |
| $\alpha = \gamma$ (°)    | 90.000                                          |
| $\beta$ (°)              | 90.0097                                         |
| Volume (Å <sup>3</sup> ) | 206.99                                          |
| R <sub>wp</sub> (%)      | 4.22                                            |
| R <sub>p</sub> (%)       | 3.22                                            |
| $\chi^2$                 | 4.757                                           |

**Supplementary Table 9.** Atomic coordinates of 4.8 V charged ID-Li<sub>2</sub>RuO<sub>3</sub> from XRD refinement.

| Atom  | Site | Coordinates |           |          | Occupation | Uiso (Å <sup>2</sup> ) |
|-------|------|-------------|-----------|----------|------------|------------------------|
|       |      | x           | y         | z        |            |                        |
| Ru(1) | 4h   | 0.000000    | 0.168110  | 0.500000 | 0.701547   | 0.045805               |
| Li(1) | 4h   | 0.000000    | 0.168110  | 0.500000 | 0.030000   | 0.039030               |
| Li(2) | 2d   | -0.500000   | 0.000000  | 0.500000 | 0.030000   | 0.039030               |
| Ru(2) | 2d   | -0.500000   | 0.000000  | 0.500000 | 0.596161   | 0.047284               |
| Li(3) | 4g   | -0.500000   | -0.158000 | 0.000000 | 0.100000   | 0.038628               |
| Ru(3) | 4g   | -0.500000   | -0.158000 | 0.000000 | 0.000254   | 0.045635               |
| Li(4) | 2a   | 0.000000    | 0.000000  | 0.000000 | 0.100000   | 0.038670               |
| Ru(4) | 2a   | 0.000000    | 0.000000  | 0.000000 | 0.000237   | 0.048176               |
| O(1)  | 8j   | 0.330751    | 0.170456  | 0.273423 | 1.000000   | 0.039911               |
| O(2)  | 4i   | -0.150312   | 0.000000  | 0.276555 | 1.000000   | 0.037253               |

**Supplementary Table 10.** Detailed fitting results (coordination number (CN), radial distance (R), and Debye–Waller factor ( $\sigma^2$ ) for the first shell) for the EXAFS oscillations of R-Li<sub>2</sub>RuO<sub>3</sub> during the first charge and discharge processes. E<sub>0</sub> was set to -0.7 eV, and the amplitude reduction factor ( $S_0^2$ ) was fixed at 0.95. 1C, 1D represent the first charge and discharge, respectively.

| State of charge | Pair  | CN  | R (Å) | $\sigma^2$ ( $\times 10^{-3}$ Å <sup>2</sup> ) |
|-----------------|-------|-----|-------|------------------------------------------------|
| Pristine        | Ru–O1 | 1.8 | 1.97  | 4.5                                            |
|                 | Ru–O2 | 4.0 | 2.01  | 4.2                                            |
| 1C 3.7 V        | Ru–O1 | 2.8 | 1.94  | 3.0                                            |
|                 | Ru–O2 | 3.0 | 1.98  | 3.4                                            |
| 1C 4.1 V        | Ru–O1 | 2.8 | 1.94  | 4.5                                            |
|                 | Ru–O2 | 3.0 | 1.97  | 4.5                                            |
| 1C 4.6 V        | Ru–O1 | 1.6 | 1.94  | 6.8                                            |
|                 | Ru–O2 | 3.0 | 1.97  | 7.0                                            |
| 1D 3.3 V        | Ru–O1 | 1.6 | 1.96  | 4.0                                            |
|                 | Ru–O2 | 3.3 | 1.98  | 4.3                                            |
| 1D 2.0 V        | Ru–O1 | 1.6 | 1.98  | 4.1                                            |
|                 | Ru–O2 | 3.3 | 2.01  | 4.3                                            |

**Supplementary Table 11.** Detailed fitting results (coordination number (CN), radial distance (R), and Debye–Waller factor ( $\sigma^2$ ) for the first shell) for the EXAFS oscillations of ID-Li<sub>2</sub>RuO<sub>3</sub> during the first charge and discharge processes. E<sub>0</sub> was set to -0.7 eV, and the amplitude reduction factor ( $S_0^2$ ) was fixed at 0.95. 1C, 1D represent the first charge and discharge, respectively.

| State of charge | Pair  | CN  | R (Å) | $\sigma^2$ ( $\times 10^{-3}$ Å <sup>2</sup> ) |
|-----------------|-------|-----|-------|------------------------------------------------|
| Pristine        | Ru–O1 | 1.2 | 1.89  | 2.7                                            |
|                 | Ru–O2 | 4.8 | 2.01  | 2.8                                            |
| 1C 3.7 V        | Ru–O1 | 1.2 | 1.86  | 2.7                                            |
|                 | Ru–O2 | 4.7 | 1.99  | 2.8                                            |
| 1C 4.3 V        | Ru–O1 | 1.3 | 1.84  | 2.7                                            |
|                 | Ru–O2 | 4.6 | 1.97  | 2.8                                            |
| 1C 4.8 V        | Ru–O1 | 1.4 | 1.83  | 2.6                                            |
|                 | Ru–O2 | 4.1 | 1.97  | 2.6                                            |
| 1D 3.46 V       | Ru–O1 | 1.2 | 1.86  | 2.7                                            |
|                 | Ru–O2 | 4.6 | 1.99  | 2.8                                            |
| 1D 2.0 V        | Ru–O1 | 1.2 | 1.90  | 2.8                                            |
|                 | Ru–O2 | 4.8 | 2.02  | 2.9                                            |

## Supplementary Notes

**Supplementary Note 1. Definition of  $\Delta G$  for oxygen release.** The total energy of the systems with and without oxygen vacancies used in the calculation of oxygen release energy for ID-Li<sub>2-x</sub>RuO<sub>3</sub> and R-Li<sub>2-x</sub>RuO<sub>3</sub> are listed in Supplementary Table 1 and Supplementary Table 2, respectively. The same oxygen vacancy concentration of 1/48 (2% of the total oxygen content) is considered for both ID-Li<sub>2-x</sub>RuO<sub>3</sub> and R-Li<sub>2-x</sub>RuO<sub>3</sub>. The Gibbs free energy of oxygen release was calculated as Supplementary Equation 1.

$$\Delta G_{(O_2 \text{ release})} = \Delta E_{(O_2 \text{ release})} + (-TS_{(O_2)}) + ZPE_{(O_2)} \quad (1)$$

where  $-TS_{(O_2)}$  and  $ZPE_{(O_2)}$  of the O<sub>2</sub> gas phase under standard conditions were taken from previous studies.<sup>1,2</sup> and  $\Delta E_{(O_2 \text{ release})}$  are defined as Supplementary Equation 2

$$\Delta E_{(O_2 \text{ release})} = 2(E_{(X-O)} + \frac{1}{2}E_{(O_2)} - E_{(X)}) \quad (2)$$

where,  $E_{(X-O)}$  and  $E_{(X)}$  indicate the calculated total energy of Li<sub>2-x</sub>RuO<sub>3</sub> with and without oxygen vacancies, respectively, where  $E_{(O_2)}$  was modified by the experimental formation energy of water as the binding energy of O<sub>2</sub> molecules from DFT calculations is overestimated.<sup>1,3</sup> The energy of the O<sub>2</sub> molecule was calculated based on Supplementary Equation 3 and 4. Values used in the calculation of  $E_{(O_2)}$  were shown in Supplementary Table 3.

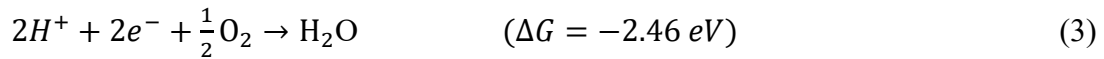

$$\Delta G = \Delta(E - TS + ZPE) = \left[ E(H_2O) - E(H_2) - \frac{1}{2}E(O_2) \right] + \left[ -TS(H_2O) + TS(H_2) + \frac{1}{2}TS(O_2) \right] + \left[ ZPE(H_2O) - ZPE(H_2) - \frac{1}{2}ZPE(O_2) \right] \quad (4)$$

**Supplementary Note 2. Two phase refinement for ID-Li<sub>2</sub>RuO<sub>3</sub> sample.** In order to evaluate the extent of intralayer disordering, two phase including regular Li<sub>2</sub>RuO<sub>3</sub> and ideal intralayer disordered Li<sub>2</sub>RuO<sub>3</sub> were used for refinement, which shows that the ratio of regular Li<sub>2</sub>RuO<sub>3</sub> and ideal intralayer disordered Li<sub>2</sub>RuO<sub>3</sub> phases is about 35: 1. The percentage of the ideal intralayer disordered Li<sub>2</sub>RuO<sub>3</sub> phase is 97.1%, confirming that the ID-Li<sub>2</sub>RuO<sub>3</sub> sample is almost the ideal intralayer disordered Li<sub>2</sub>RuO<sub>3</sub> phase.

## Supplementary References

- 1 Nørskov, J. K. *et al.* Origin of the overpotential for oxygen reduction at a fuel-cell cathode. *J. Phys. Chem. B* **108**, 17886–17892 (2004).
- 2 Atkins, P. Atkins' Physical Chemistry, 8th ed. *Oxford University Press: Oxford, U. K.*, 999 (2006).
- 3 Xiao, R., Li, H. & Chen, L. Density functional investigation on Li<sub>2</sub>MnO<sub>3</sub>. *Chem. Mater.* **24**, 4242–4251 (2012).
